1 **COVID-19 Surveillance in the Biobank at the Colorado Center for Personalized Medicine**

2 Randi K. Johnson<sup>1,2,3+</sup>, Katie M. Marker<sup>1,2,4+</sup>, David Mayer<sup>1</sup>, Jonathan Shortt<sup>1</sup>, David Kao<sup>1,2</sup>,

3 Kathleen C. Barnes<sup>1,2</sup>, Jan T. Lowery<sup>2,3+</sup>, Christopher R. Gignoux<sup>1,2,4+</sup>

4 1. Division of Biomedical Informatics and Personalized Medicine, Department of Medicine,  
5 University of Colorado School of Medicine

6 2. Colorado Center for Personalized Medicine, University of Colorado

7 3. Department of Epidemiology, Colorado School of Public Health

8 4. Human Medical Genetics and Genomics Program, University of Colorado Anschutz  
9 Medical Campus

10

11 + *contributed equally*

12

13 **ABSTRACT**

14 **Background:** Characterizing the experience and impact of the COVID-19 pandemic among  
15 various populations remains challenging due to the limitations inherent in common data sources  
16 such as the electronic health record (EHR) or convenience sample surveys.

17 **Objective:** To describe testing behaviors, symptoms, impact, vaccination status and case  
18 ascertainment during the COVID-19 pandemic using integrated data sources.

19 **Methods:** In summer 2020 and 2021, we surveyed participants enrolled in the Biobank at the  
20 Colorado Center for Personalized Medicine (CCPM, N = 180,599) about their experience with  
21 COVID-19. Prevalence of testing, symptoms, and the impacts of COVID-19 on employment,  
22 family life, and physical and mental health were calculated overall and by demographic

23 categories. Using the Electronic Health Record (EHR), we compared COVID-19 case  
24 ascertainment and characteristics in the EHR versus the survey.

25 **Results:** Of the 25,063 survey respondents (13.9%), 42.5% had been tested for COVID-19 and  
26 of those, 12.8% tested positive. Nearly half of those tested had symptoms and/or had been  
27 exposed to someone who was infected. Young adults (18-29 years) and Hispanics were more  
28 likely to have positive tests compared to older adults and persons of other racial/ethnic groups.  
29 Mental health (54.6%) and family life (48.8%) were most negatively affected by the pandemic  
30 and more so among younger groups and women; negative impacts on employment were more  
31 commonly reported among Black respondents. After integration with EHR data up to the time of  
32 the survey completion, 4.0% of survey respondents (n=1,006) had discordant COVID-19 case  
33 status between the EHR and the survey. Using all longitudinal EHR and survey data, we  
34 identified 11,472 COVID-positive cases among Biobank participants (6.4%). In comparison to  
35 COVID-19 cases identified through the survey, EHR-identified cases were younger and more  
36 likely to be Hispanic.

37 **Conclusions:** Integrated data assets such as the Biobank at the CCPM are key resources for  
38 population health monitoring in response to public health emergencies, such as the COVID-19  
39 pandemic.

40

41 **Trial Registration:** N/A.

42

43 **Keywords:** COVID-19, surveillance, pandemic, biobank, EHR

44

45 **INTRODUCTION**

46           The Coronavirus Disease 2019 (COVID-19) global pandemic has caused significant  
47 burden on the health and well-being of our families and communities. It has changed the way we  
48 work, socialize, and go about our daily lives. To date, over 888,000 Americans have died from  
49 COVID-19 and more than 49 million have been infected with the virus, many of whom have  
50 been hospitalized and/or suffered from a range of symptoms lasting from days to years [1].  
51 Further, the burden of this disease, with respect to infection rates, hospitalizations, deaths and  
52 impacts on physical and mental health is not evenly distributed throughout the population.  
53 Understanding the nature and magnitude of this disease has been challenging due to the evolving  
54 nature of this virus, changing recommendations from public health around testing and self-  
55 quarantine, and our own health behaviors to avoid exposure.

56           As we strive to understand this novel virus in terms of risk and outcomes, it is important  
57 to assess the impact of COVID-19 among various populations including those who may  
58 experience serious versus mild effects from infection, those who experience symptoms but do  
59 not undergo testing, and those who never contract the disease. This broad inquiry requires  
60 multiple data sources. Electronic health records (EHR) are useful for capturing information on  
61 persons who seek medical care and/or become hospitalized due to COVID-19, and thus may  
62 reflect more severe cases [2-4]. However due to incomplete and unstructured data collection in  
63 EHRs, self-reported population surveys can provide information on persons with more mild  
64 disease who may opt not to seek medical care and those never infected [5]. Combining data  
65 sources from the EHR and surveys can mitigate limitations and biases inherent in each as well as  
66 optimize capture of the COVID-19 experience in a broader population.

67           We sought to characterize the experience and impact of the COVID-19 virus among a  
68 large and diverse group of persons enrolled in the Biobank at the Colorado Center for

69 Personalized Medicine (CCPM), a collaborative initiative supported by UCHealth and the  
70 University of Colorado Anschutz Medical Campus. Specifically, we assessed the prevalence of  
71 testing and positive test results, the type and frequency of symptoms, health-care utilization,  
72 severity of disease, and the impacts of the pandemic on mental and physical health and  
73 employment. Uniquely, for this analysis, we were able to combine clinical data from the EHR,  
74 with self-reported information collected via an online survey that was offered to all Biobank  
75 participants.

76 We present here results from our analysis of self-reported survey data and clinical data  
77 recorded in the EHR for Biobank participants. By combining these unique data sources, we were  
78 able to capture more COVID-19+ cases and assess population differences in symptoms,  
79 healthcare utilization, severity (hospitalization), and personal impact. We also highlight the value  
80 of biobanks such as ours in facilitating rapid and comprehensive inquiries about emerging public  
81 health threats like COVID-19.

82

## 83 **METHODS**

### 84 **Study Population**

85 Enrollment in the CCPM Biobank is open to all UCHealth patients who are 18 years of  
86 age or older and able to provide consent for themselves through My Health Connection, the  
87 mobile EHR patient portal for UCHealth. Enrolled participants consent to use of their clinical  
88 data from the EHR and to being re-contacted about new research opportunities and to complete  
89 surveys. To date, the Biobank has enrolled over 200,000 adult participants from among the 2.5  
90 million UCHealth patients across Colorado. Biobank participants are representative of the whole  
91 UCHealth population with respect to age, gender, race/ethnicity and co-morbidity status

92 **(Multimedia Appendix 1)**. For this study, all living Biobank participants with a valid email  
93 address were invited to complete an online survey about their experience with the COVID-19  
94 pandemic. We linked survey responses with participants' demographic and clinical data from the  
95 EHR that are captured and stored within Health Data Compass (Compass), the clinical data  
96 warehouse for UHealth and the CCPM Biobank.

### 97 **Survey Development and Administration**

98 We developed our survey based on an instrument developed by the International  
99 Common Disease Alliance (ICDA) [6] early in the pandemic. Our survey included questions  
100 about testing for COVID-19, test results, symptoms related to COVID-19 infection, health care  
101 utilization following a positive test and/or symptoms, underlying health conditions, the impact of  
102 COVID-19 on health and well-being, potential household exposure to COVID-19, and current  
103 smoking behaviors **(Multimedia Appendix 2)**. We created the survey in REDCap [7], a HIPAA-  
104 compliant database and research management platform, and created unique survey links for each  
105 Biobank participant. Personal invitations to complete the survey were sent by email to all  
106 participants beginning in June 2020 with a follow-up reminder to non-responders within 2  
107 weeks. We repeated the process in October 2020 to all newly enrolled participants between June  
108 and October 2020. We revised the survey in March 2021 to include additional questions on  
109 vaccine uptake, adverse reactions to the vaccine and long-term symptoms post infection  
110 **(Multimedia Appendix 3)**. The revised survey was sent to all participants who hadn't responded  
111 to the initial survey and newly enrolled participants through May 2021. In total, survey invites  
112 were sent to 180,599 individual participants over the course of 15 months.

### 113 **COVID-19 Case and Severity Definitions: Survey and EHR**

114 Survey respondents who reported receiving a positive COVID-19 test result were  
115 considered a “confirmed case” of COVID-19. Self-reported cases also reported whether the  
116 respondent tested positive for COVID-19, saw a doctor in-person or through telehealth, visited  
117 the emergency room, were hospitalized overnight, stayed home/isolated, or did nothing different.  
118 We looked at severity either in terms of hospitalization due to COVID-19 or death after COVID-  
119 19. Respondents who reported having one or more overnight stays in the hospital were  
120 considered to be ‘hospitalized’.

121 Positive cases were identified in the EHR using ICD-10 diagnosis codes, healthcare  
122 encounter types, and encounter primary diagnoses. Participants who received an ICD-10  
123 diagnosis code of U07.1 or at least one of 11 COVID-19 specific encounter primary diagnoses  
124 (**Multimedia Appendix 4**) were considered an “EHR-confirmed case”. Participants who were  
125 hospitalized in a UCHHealth hospital overnight during the 3 days before or up to 21 days after  
126 their COVID-19 diagnosis date and who had at least one of 64 COVID-19 related encounter  
127 primary diagnoses (**Multimedia Appendix 5**) were considered to be “EHR-hospitalized.” To  
128 compare positive cases identified from the EHR and survey, we examined the number of  
129 hospitalized cases that were discordant between these data sources.

130 All-cause mortality data stored in the Health Data Compass clinical data warehouse  
131 include the cause of death as certified by a physician or coroner/medical examiner, related ICD-  
132 10 cause of death codes generated by Centers for Disease Control, and age at death. These data  
133 are obtained through routine linkage of UCHHealth patients with the vital statistics/death  
134 certificates provided by the Department of Vital Statistics at the Colorado Department of Public  
135 Health and the Environment (CDPHE). Accounting for the ~3-month lag time to register

136 certificates, map ICD-10 cause of death codes, and update the clinical databases, the  
137 ascertainment of mortality among UCHHealth patients for this analysis is nearly 95% complete.

### 138 **Other Definitions**

139 Age and race-ethnicity were determined from the EHR.. Race and ethnic indicators were  
140 extracted as encoded in the EHR and categorized into 4 racial-ethnic groups to preserve >10  
141 individuals in each group in all analyses, including: non-Hispanic White, non-Hispanic Black,  
142 any Hispanic, other.

### 143 **Statistical Analysis**

144 We generated descriptive statistics to characterize our study population and responses to  
145 survey questions. We also stratified respondents with respect to COVID-19 infection status  
146 based on reported test status and symptomology. We compared COVID-19+ individuals that  
147 were identified via the survey and via the EHR by demographics and severity (overnight  
148 hospitalization and death). We investigated case status and hospitalization misclassification in  
149 both the survey and EHR by comparing those who were discordant in the survey and EHR. We  
150 calculated differences between groups using chi-square and t-test statistics for categorical and  
151 continuous measures, respectively. As expected, due to very large sample size in the study, most  
152 comparisons were statistically significant at a two-sided  $\alpha < 0.05$ . Therefore, we focus results  
153 and interpretation on effect sizes and corresponding standard error of the estimate.

154

## 155 **RESULTS**

### 156 **Survey response**

157 Of 180,599 biobank participants with valid email addresses, 25,063 completed at least  
158 one survey and had complete demographic information (response rate = 13.9%, **Figure 1**).

159 Compared to non-respondents (**Multimedia Appendix 6**), respondents were older (mean age =  
160 55.0 years vs. 48.6 years,  $P < .001$ ) and enriched for a higher proportion of females (62.6% vs.  
161 59.0%,  $P < .001$ ) and individuals of non-Hispanic White race-ethnicity (87.4% vs. 77.1%,  
162  $P < .001$ ).

163

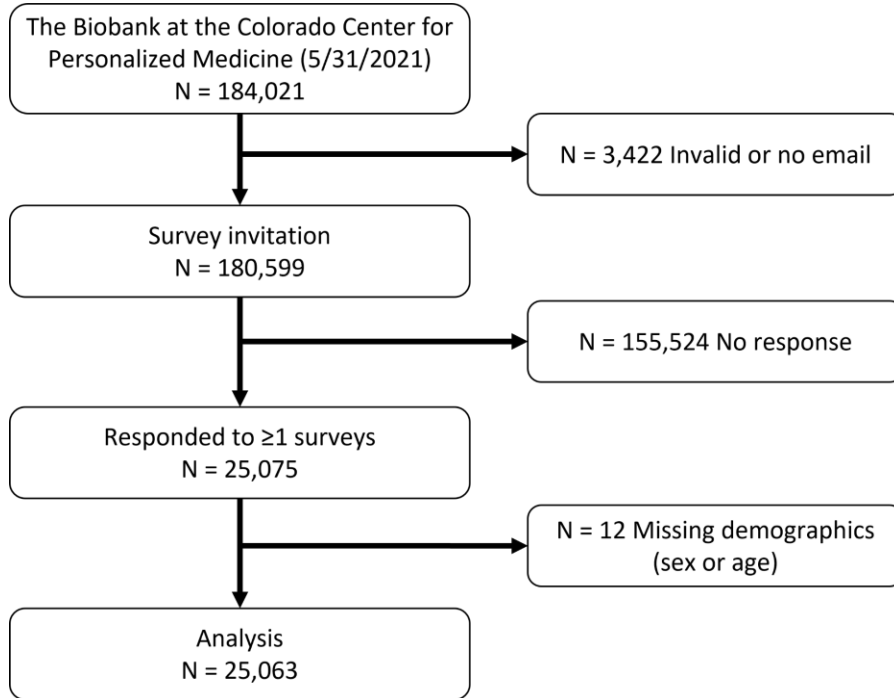

164

165 **Figure 1: The Biobank at the Colorado Center for Personalized Medicine COVID-19**  
166 **Survey Population.**

167

### 168 **COVID-19 Testing**

169 Among all survey respondents, 42.5% (n=10,661) reported being tested for COVID-19.

170 The most common reasons for testing were having symptoms (29.5%), exposure to someone

171 who tested positive for COVID-19 (18.5%), doctor recommendation (14.7%), requirement of

172 employer (8.9%), and recent international travel (3.4%). An additional 40.8% of individuals



173 tested, reported ‘other’ reasons for testing that included having surgery or other medical  
174 procedure, planned travel, desire or need to be around large groups or family members and work-  
175 site offerings for testing.

176           Of those tested, 1366 (12.8%) tested positive for COVID-19 (**Table 1**) and were  
177 considered confirmed cases. The distributions of age, sex, race-ethnicity, college education,  
178 number of symptoms, number of pre-existing comorbidities, overall health status, and exposure  
179 to a household member who tested positive for COVID-19 were different across the three groups  
180 of those who tested positive, tested negative, and were not tested (all  $P < .001$ ). Young adults  
181 (ages 18-29 years) were overrepresented among the tested-positive group, representing 10.7% of  
182 those who tested positive compared to 6.7% of those who tested negative and 5.1% of those who  
183 were not tested ( $P$  for trend  $< .001$ ). Similarly, individuals of Hispanic race-ethnicity were  
184 overrepresented in the tested-positive group at 9.2%, compared to 5.7% of those who tested  
185 negative and 4.3% of those who were not tested. Individuals who tested positive were also more  
186 likely to report symptoms, household exposure to COVID-19 and poor health status (Table 1, all  
187  $P < .001$ ).

188

**Table 1: COVID-19 Testing in the Biobank among Survey Respondents**

|                                            | Total            | Tested          |                 |          | Not Tested          |           | P-value*** |
|--------------------------------------------|------------------|-----------------|-----------------|----------|---------------------|-----------|------------|
|                                            |                  | Tested Positive | Tested Negative | P-value* | N=14,402            | P-value** |            |
| <b>Characteristics</b>                     | <b>N=25,063</b>  | <b>N=1366</b>   | <b>N=9295</b>   |          |                     |           |            |
| <b>Age, mean (SD)</b>                      | 55.0<br>(15.8)   | 48.9<br>(14.6)  | 53.7 (15.6)     | <.001    | 56.5 (15.8)         | <.001     | <.001      |
| <b>Age, n (%)</b>                          |                  |                 |                 | <.001    |                     | <.001     | <.001      |
| 18-29                                      | 1503<br>(6.0%)   | 146<br>(10.7%)  | 619<br>(6.7%)   |          | 738 (5.1%)          |           |            |
| 30-64                                      | 15049<br>(60.0%) | 1000<br>(73.2%) | 5890<br>(63.4%) |          | 8159<br>(56.7%)     |           |            |
| 65+                                        | 8511<br>(34.0%)  | 220<br>(16.1%)  | 2786<br>(30.0%) |          | 5505<br>(38.2%)     |           |            |
| <b>Sex, n (%)</b>                          |                  |                 |                 | 0.09     |                     | <.001     | <.001      |
| Female                                     | 15695<br>(62.6%) | 902<br>(66.0%)  | 5915<br>(63.6%) |          | 8878<br>(61.6%)     |           |            |
| Male                                       | 9368<br>(37.4%)  | 464<br>(34.0%)  | 3380<br>(36.4%) |          | 5524<br>(38.4%)     |           |            |
| <b>Race-Ethnicity, n (%)</b>               |                  |                 |                 | <.001    |                     | <.001     | <.001      |
| Non-Hispanic White                         | 21916<br>(87.4%) | 1117<br>(81.8%) | 8072<br>(86.8%) |          | 12727<br>(88.4%)    |           |            |
| Non-Hispanic Black                         | 308<br>(1.2%)    | 24.0<br>(1.8%)  | 133<br>(1.4%)   |          | 151 (1.0%)          |           |            |
| Hispanic                                   | 1272<br>(5.1%)   | 125<br>(9.2%)   | 528<br>(5.7%)   |          | 619 (4.3%)          |           |            |
| Other                                      | 1567<br>(6.3%)   | 100<br>(7.3%)   | 562<br>(6.0%)   |          | 905 (6.3%)          |           |            |
| <b>Bachelors Degree, n (%)</b>             |                  |                 |                 | <.001    |                     | 0.13      | <.001      |
| Yes                                        | 19407<br>(77.4%) | 973<br>(71.2%)  | 7219<br>(77.7%) |          | 11215<br>(77.9%)    |           |            |
| No                                         | 5482<br>(21.9%)  | 381<br>(27.9%)  | 2008<br>(21.6%) |          | 3093<br>(21.5%)     |           |            |
| Unknown                                    | 174<br>(0.7%)    | 12.0<br>(0.9%)  | 68.0<br>(0.7%)  |          | 94.0<br>(0.7%)      |           |            |
| <b>Number of Acute Symptoms, mean (SD)</b> | 0.261<br>(1.05)  | 2.09<br>(2.61)  | 0.393<br>(1.15) | <.001    | 0.00222<br>(0.0897) | <.001     | <.001      |
| <b>Number of Comorbidities, mean (SD)</b>  | 1.51<br>(1.38)   | 1.46<br>(1.46)  | 1.59 (1.44)     | 0.004    | 1.46 (1.32)         | <.001     | <.001      |
| <b>Health Status, n (%)</b>                |                  |                 |                 | <.001    |                     | <.001     | <.001      |
| Excellent                                  | 5664<br>(22.6%)  | 235<br>(17.2%)  | 1993<br>(21.4%) |          | 3436<br>(23.9%)     |           |            |

|                                                |                  |                 |                 |       |                  |       |       |
|------------------------------------------------|------------------|-----------------|-----------------|-------|------------------|-------|-------|
| Very Good                                      | 10532<br>(42.0%) | 444<br>(32.5%)  | 3784<br>(40.7%) |       | 6304<br>(43.8%)  |       |       |
| Good                                           | 6558<br>(26.2%)  | 440<br>(32.2%)  | 2527<br>(27.2%) |       | 3591<br>(24.9%)  |       |       |
| Fair                                           | 1859<br>(7.4%)   | 196<br>(14.3%)  | 793<br>(8.5%)   |       | 870 (6.0%)       |       |       |
| Poor                                           | 323<br>(1.3%)    | 45.0<br>(3.3%)  | 151<br>(1.6%)   |       | 127 (0.9%)       |       |       |
| Unknown                                        | 127<br>(0.5%)    | 6.00<br>(0.4%)  | 47.0<br>(0.5%)  |       | 74.0<br>(0.5%)   |       |       |
| <b>Questionnaire Version, n (%)</b>            |                  |                 |                 | <.001 |                  | <.001 | <.001 |
| 1-Summer-Fall 2020                             | 14814<br>(59.1%) | 410<br>(30.0%)  | 3718<br>(40.0%) |       | 10686<br>(74.2%) |       |       |
| 2-Summer-Fall 2021                             | 10249<br>(40.9%) | 956<br>(70.0%)  | 5577<br>(60.0%) |       | 3716<br>(25.8%)  |       |       |
| <b>EHR COVID-19 Case, n (%)</b>                |                  |                 |                 | <.001 |                  | <.001 | <.001 |
| Yes                                            | 717<br>(2.9%)    | 519<br>(38.0%)  | 125<br>(1.3%)   |       | 73.0<br>(0.5%)   |       |       |
| No                                             | 24346<br>(97.1%) | 847<br>(62.0%)  | 9170<br>(98.7%) |       | 14329<br>(99.5%) |       |       |
| <b>Household Member Tested Positive, n (%)</b> |                  |                 |                 | <.001 |                  | <.001 | <.001 |
| No                                             | 19472<br>(77.7%) | 482<br>(35.3%)  | 7268<br>(78.2%) |       | 11722<br>(81.4%) |       |       |
| Yes                                            | 1519<br>(6.1%)   | 691<br>(50.6%)  | 517<br>(5.6%)   |       | 311 (2.2%)       |       |       |
| Unknown                                        | 4072<br>(16.2%)  | 193<br>(14.1%)  | 1510<br>(16.2%) |       | 2369<br>(16.4%)  |       |       |
| <b>Genetic Data, n (%)</b>                     |                  |                 |                 | 0.17  |                  | <.001 | <.001 |
| No                                             | 20182<br>(80.5%) | 1157<br>(84.7%) | 7732<br>(83.2%) |       | 11293<br>(78.4%) |       |       |
| Yes                                            | 4881<br>(19.5%)  | 209<br>(15.3%)  | 1563<br>(16.8%) |       | 3109<br>(21.6%)  |       |       |

\* From chi-square or anova, comparing tested positive vs. tested negative

\*\* From chi-square or anova, comparing tested vs. not tested

\*\*\* From chi-square or anova, comparing tested positive vs. tested negative vs. not tested

190

191

192 **COVID-19 Case Symptomology**

193 Out of the 1,366 COVID-19+ individuals identified from the survey, 1,154 (84.4%)  
194 individuals had at least one of the following COVID-19 related symptoms since February 2020:  
195 cough, fever over 99.9°F, general tiredness/fatigue, muscle/body aches, runny nose, difficulty  
196 breathing/shortness of breath, loss of sense of smell or taste, stomach or gastrointestinal (GI)  
197 problems (**Figure 2**). However, only 48.4% reported at least one symptom 14 days before or  
198 after a positive COVID-19 test (n = 661). The number of symptoms individuals reported is  
199 relatively even from one to eight symptoms, ranging from 3.7% (n = 50) reporting all eight  
200 symptoms and 8.4% (n = 115) reporting four symptoms (Figure 2A). General tiredness/fatigue  
201 and muscle/body aches were the most commonly reported symptoms within 14 days of a positive  
202 COVID-19 test, at 37.8% and 31.2%, respectively (Figure 2B). Next most common was loss of  
203 sense of smell or taste, with 397 (29.1%) reporting within 14 days of a positive COVID-19 test  
204 (Figure 2B). However, an additional 283 individuals reported this symptom outside the 28-day  
205 window. A quarter of individuals reported a cough within 14 days of a positive COVID-19 test  
206 (n = 346) and 22.7% and 22.1% reported difficulty breathing/shortness of breath and a runny  
207 nose, respectively (Figure 2B). Only 17.1% of individuals (n = 234) reported stomach or GI  
208 problems (Figure 2B). The remainder (51.6%) reported no symptoms within 14 days before or  
209 after their COVID-19 positive test (n = 705). There were no significant differences in  
210 asymptomatic cases compared to symptomatic cases (having at least one symptom) when  
211 comparing by age, sex, or race/ethnicity (Figure 2C-E).

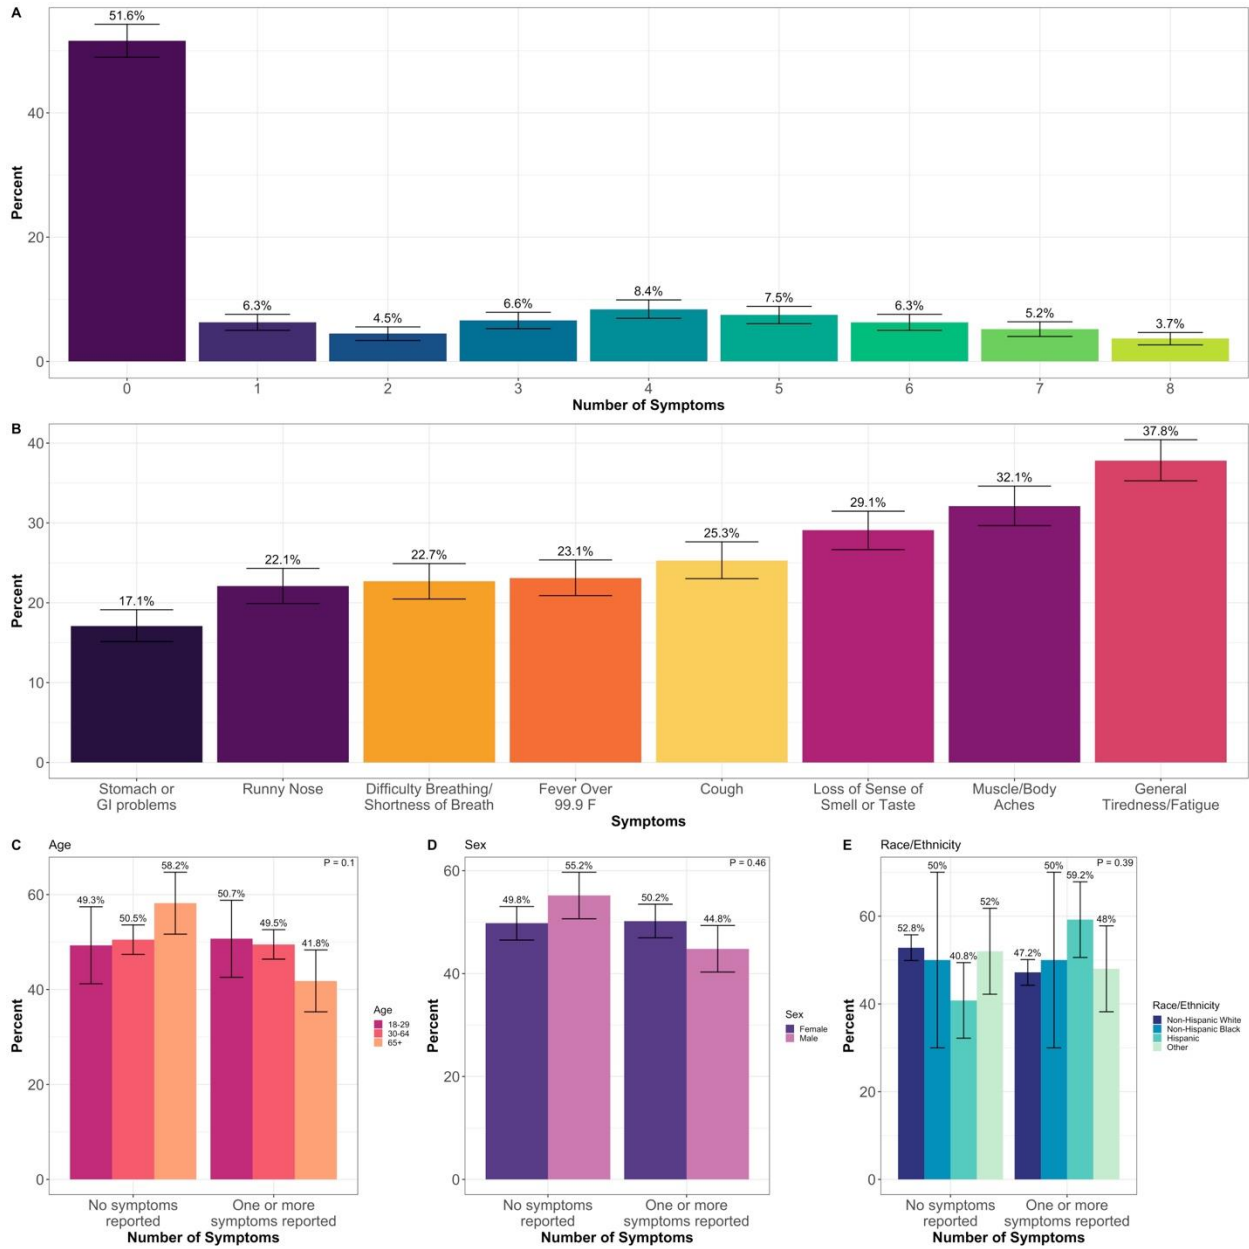

213

214 **Figure 2: Symptomology among COVID-19 cases.** Each symptom was reported 14 days  
 215 before or 14 days after a positive COVID-19 test. A) Number of symptoms reported among  
 216 COVID-19 cases. B) Percent of COVID-19 positive cases that reported each symptom.  
 217 Comparing asymptomatic cases compared to symptomatic cases (at least one symptom) by C)  
 218 age, D) sex, E) race/ethnicity. P = p-value from Pearson’s chi-square test for different

219 distributions across demographic groups. Error bars indicate the 95% confidence interval for the  
220 percent point estimate.

221

## 222 **Health Behaviors and Impact on Healthcare System**

223 To assess health behaviors among COVID-19 cases and the potential impact on the  
224 healthcare system, we asked these individuals what they did as a result of testing positive (Figure  
225 3A). Eighty-one percent of the 1,366 respondents with positive tests stayed home and self-  
226 isolated (n = 1108), and 5.6% did not report any changes in behavior (n = 76) (Figure 3A). Of  
227 those who did not change behavior, 82.9% did not have any symptoms reported 14 days before  
228 or after their COVID-19 test (n = 63). Among the 1,366 positives, 625 (45.8%) of those sought  
229 out at least one form of medical care. One hundred ninety (14%) saw a doctor at an in-person  
230 visit, 454 (33.2%) saw a doctor via telehealth, 14.2% went to the emergency room (n = 194) and  
231 7.9% had an overnight stay in a hospital (n = 108) (Figure 3A). A subset of 229 (16.7%)  
232 individuals reported being tested at a UHealth facility (n = 229, 16.7%) vs. 213 (15.6%) outside  
233 UHealth with no response from 924 respondents. Of the 229 respondents who said they tested  
234 positive at a UHealth facility, only 59.8% (n = 137), were identified as a 'case' within the  
235 EHR. There is a high rate of missingness for the question on who performed the test (67.6%), so  
236 there may be confusion by participants about who supplied the COVID-19 test.

237 Among respondents who were not tested but reported having at least 1 COVID-related  
238 symptom, 1901 (41.9%) said they did nothing different, whereas 1920 (42.3%) stayed home and  
239 self-isolated (Figure 3B). A third (n = 1,515) sought out at least one form of medical care, 934  
240 (20.6%) had an in-person clinic visit, 77 (17.1%) had a telehealth clinic visit, 275 (6.1%) went to  
241 the ER, and 90 (2.0%) had an overnight stay in the hospital (Figure 3B).

242

243

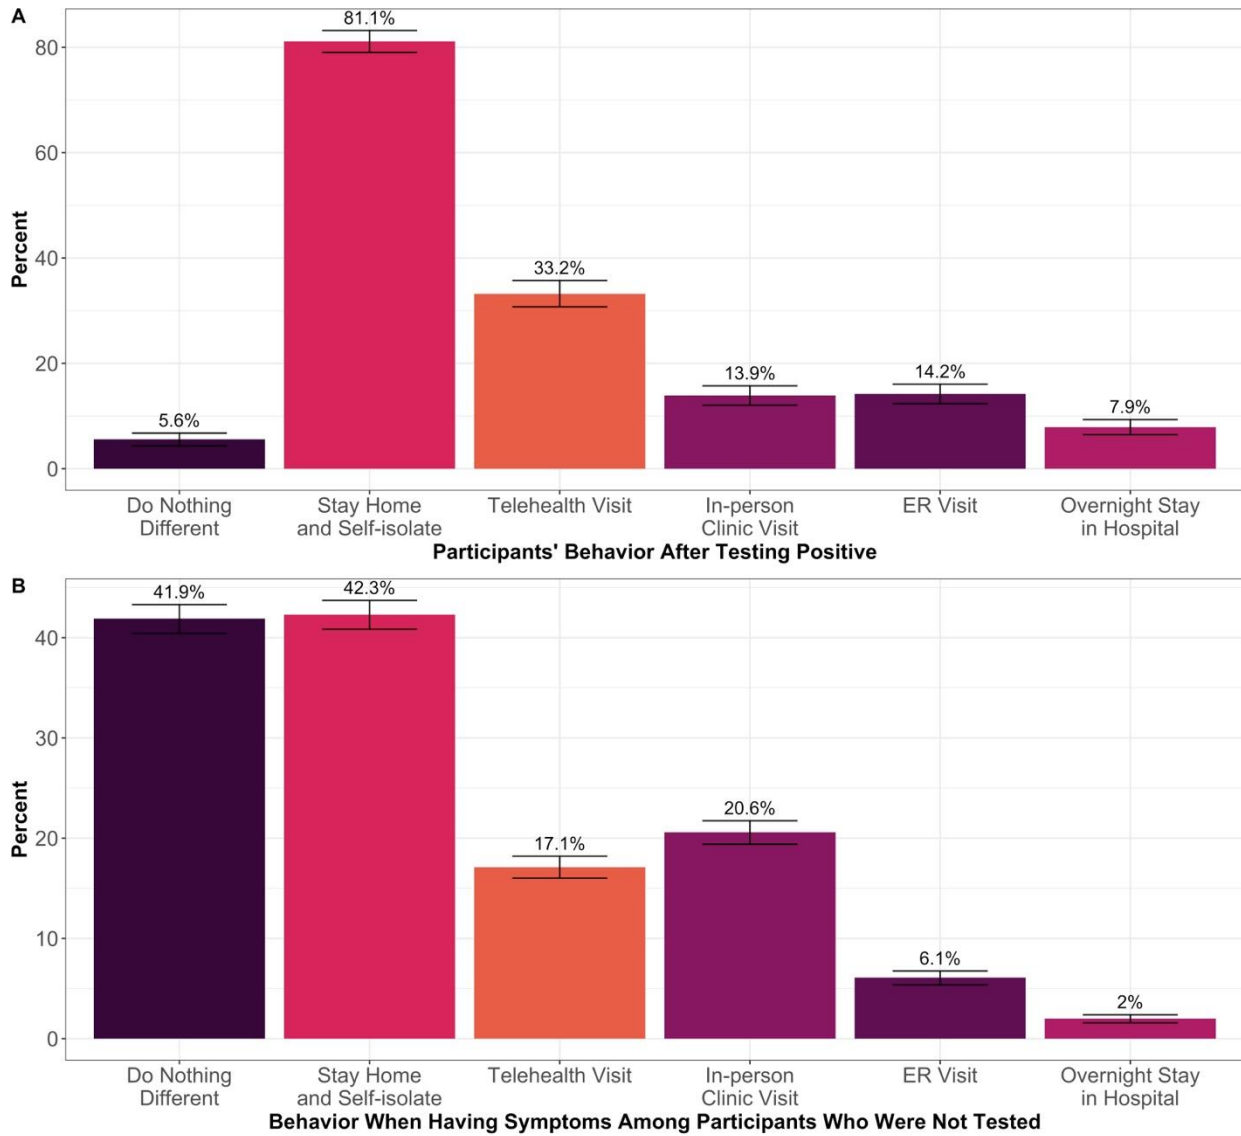

244

245 **Figure 3: The impact of COVID-19 on the health care system.** A) Participants' behavior after  
246 testing positive for COVID-19, B) Participants' behavior when having symptoms, among those  
247 with at least one symptom whom did not get tested for COVID-19. Error bars indicate the 95%  
248 confidence interval for the percent point estimate.

249

250 **Impact of the COVID-19 Pandemic**

251 The impact of the COVID-19 pandemic on employment, family life, mental health or  
252 physical health was largely negative, with more than 75% of respondents (n=18,861) reporting a  
253 negative impact from the COVID-19 pandemic in at least one of these domains, compared to  
254 23% of respondents (n=5,856) reporting a positive impact in at least one domain ( $P<.001$ ).  
255 Mental health and family life were most negatively affected by the pandemic, at 54.6%  
256 (n=13,688) and 48.8% (n=12,233) of respondents reporting a negative impact, respectively.  
257 Negative impact in other two domains was lower at 28.2% (n=7,059) for physical health and  
258 21.2% (n=5,320) for employment ( $P<.001$ ).

259 The impact of the COVID-19 pandemic was not equal across groups by age, race-  
260 ethnicity, sex, and COVID-19 testing status (max  $P=.006$ , **Figure 4**). A higher proportion of  
261 young adults reported a negative mental health impact (74.9%, 95%CI = 72.7-77.1%) than adults  
262 aged 30-64 years (60.7%, 95%CI = 59.6-61.5%) and older adults, 65+ years (41.1%, 95%CI =  
263 40.1-42.2%). A similar linear trend across age groups was seen for the negative impact of the  
264 pandemic on employment and physical health (Figure 4A). Using self-reported race-ethnicity as  
265 captured in the EHR, a higher proportion of non-Hispanic Black respondents reported a negative  
266 impact on their employment (35.8%, 95%CI = 30.4-41.2%) compared to other race-ethnic  
267 groups (all proportions < 26.1%, Figure 2B). Women reported greater negative impact in all four  
268 domains compared to men, at (respectively) 23.4% versus 18.3% in employment, 50.5% versus  
269 47.0% in family life, 60.3% versus 46.0% in mental health, and 30.7% versus 24.4% in physical  
270 health (Figure 4C, all  $P<.001$ ). Respondents who tested positive for COVID-19 reported a higher  
271 negative impact on their physical health (55.0%, 95%CI = 52.3-57.6%) than those who tested  
272 negative (30.9%, 95%CI = 30.0-31.9%) and those who did not report a COVID-19 test (24.2%,  
273 95%CI = 23.5-24.9%, Figure 4D).



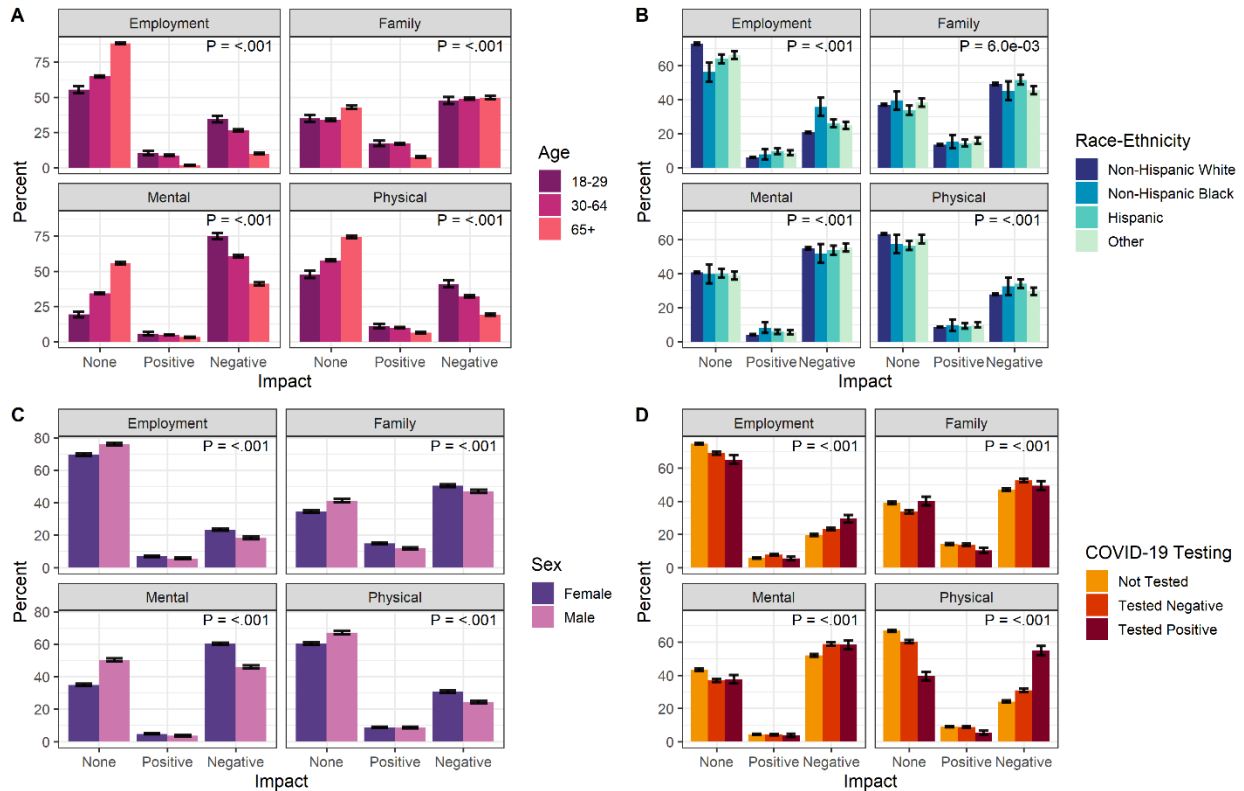

275

276 **Figure 4: The impact of COVID-19 on employment, family life, mental and physical health**

277 **by A) age, B) race-ethnicity, C) sex, and D) COVID-19 test status.**  $P = p$ -value from

278 Pearson’s chi-square test for different distributions across impact and demographic groups. Error

279 bars indicate the 95% confidence interval for the percent point estimate.

280

281 **COVID-19 Vaccination**

282 In our second round of the survey (administered Spring/Summer 2021), we added

283 questions about COVID-19 vaccination. Of the 10,249 individuals who responded, 95.3% had

284 received the vaccine ( $n = 9,770$ ). Younger people were less likely to have received a vaccine:

285 7.5% of those aged 18-29 years did *not* receive a vaccine compared to 4.9% of individuals ages

286 30-64 years and 2.0% of individuals 65+ ( $P < .001$ , **Figure 5A**). Women were slightly less likely

287 to receive a vaccine (4.5% of women vs. 3.3% of men;  $P = 0.003$ , **Figure 5B**). Vaccination rate  
 288 was very similar across race/ethnicity categories, with 4.1% of non-Hispanic Whites, 4.3% of  
 289 non-Hispanic Blacks, 4.1% of Hispanics, and 3.3% of those in the other race category not  
 290 receiving vaccines ( $P = 0.8$ , Figure 5C). The median income of the home 3-digit zip code was  
 291 lower for unvaccinated participants: \$67,800 in the unvaccinated compared to \$71,500 in the  
 292 vaccinated ( $P < .001$ ). The median percent of the population who received a bachelor's degree by  
 293 3-digit zip code was lower for unvaccinated participants (37.7%) compared to vaccinated  
 294 participants (47.3%),  $P < .001$ .

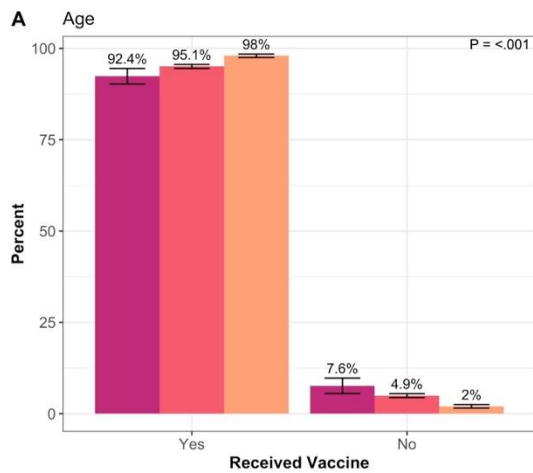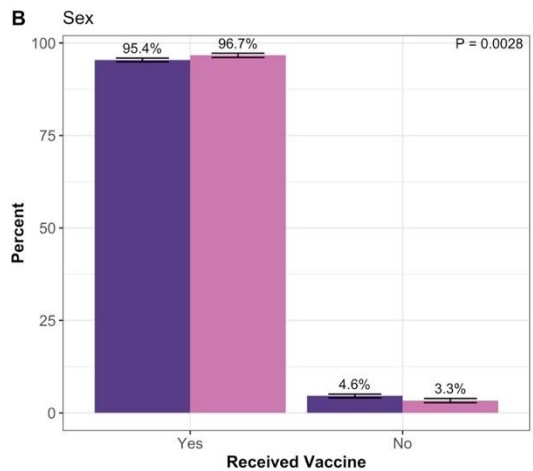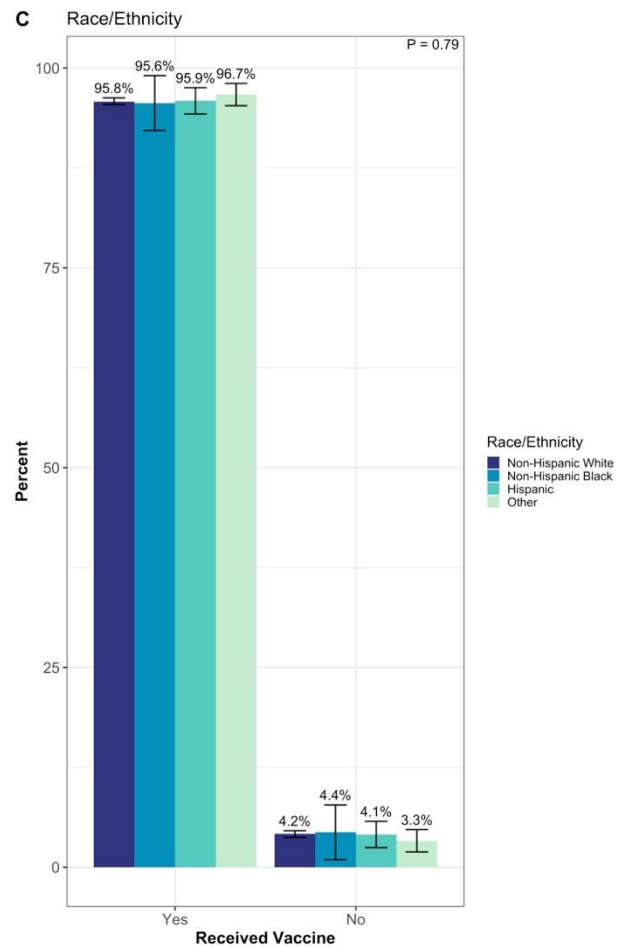

296 **Figure 5: Vaccine uptake by A) age, B) sex, and C) race-ethnicity.**  $P = p$ -value from  
297 Pearson's chi-square test for different distributions across impact and demographic groups. Error  
298 bars indicate the 95% confidence interval for the percent point estimate.

299

### 300 **Demographics of COVID-19 Cases Captured by EHR versus Survey**

301 We identified 11,472 COVID-19 positive cases from among 180,599 eligible Biobank  
302 participants: 1,366 from the survey (5.4% of respondents) and 10,639 from the EHR (5.9% of  
303 records); 533 cases were identified in both sources (Figure 6).

304

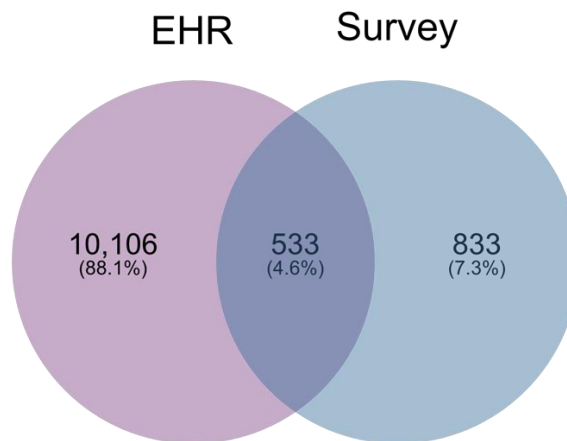

305

306 **Figure 6: COVID-19 positive CCPM Biobank participants identified through the**  
307 **UCHealth EHR and the Survey.**

308

309 In comparing COVID-19 cases from the EHR to those in the survey (**Figure 7**), we found  
310 that cases identified in the EHR were younger, with 17.2% of individuals in the 18-29 age group  
311 compared to 10.7% in the survey group ( $P < .001$ , Figure 7A). A higher percentage of cases

312 identified in the EHR were Hispanic compared to survey cases (14.7% vs 9.2%, respectively,  
 313  $P < .001$ , Figure 7B). The EHR cases also had a slightly lower proportion of women (61.9%)  
 314 compared to the survey group (66.0%); ( $P = 0.003$ , Figure 7C). The median income for the 3-  
 315 digit zip code was the same, \$69,900 in both groups. The median percent of the population who  
 316 received a bachelor's degree by 3-digit zip code was slightly lower in the EHR group (41.3%)  
 317 compared to the survey (45.7%),  $P < .001$ .

318

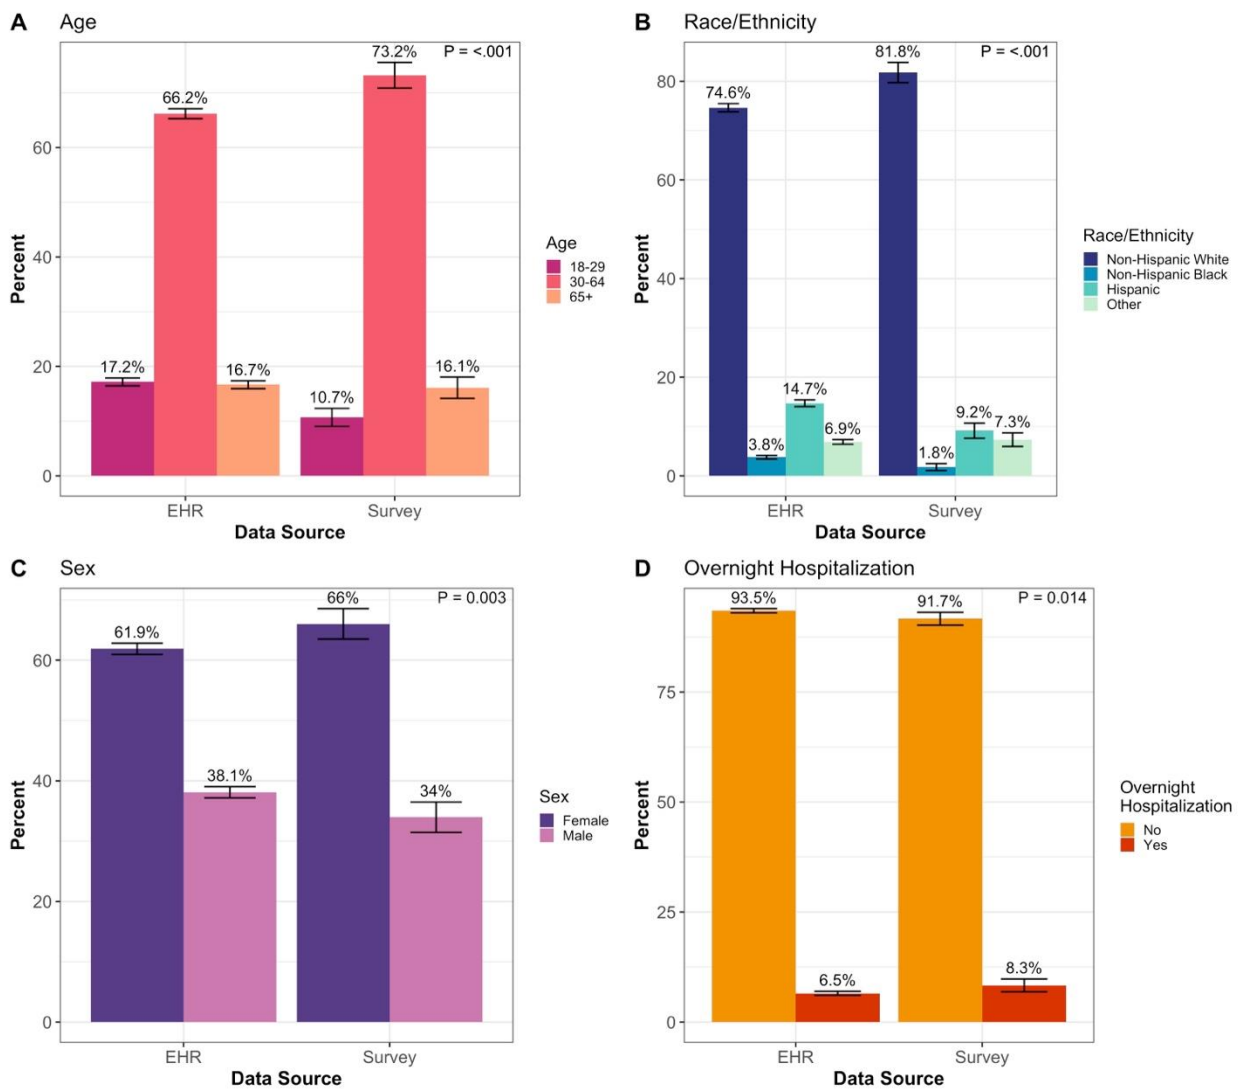

319

320 **Figure 7: Comparison of COVID-19 cases captured in the EHR and the survey by A) age,**  
321 **B) race/ethnicity, C) sex, and D) COVID-19 related overnight hospitalization.**  $P = p$ -value  
322 from Pearson's chi-square test for different distributions across impact and demographic groups.  
323 Error bars indicate the 95% confidence interval for the percent point estimate.

324

### 325 **Comparison of COVID-19 Case Severity in EHR versus Survey**

326 A higher percent of COVID-positive cases identified from the survey were hospitalized  
327 overnight (8.3%) compared to the EHR group (6.5%) ( $P = 0.01$ , Figure 7D). Using all-cause  
328 mortality data obtained from CDPHE vital statistics, 130 (2.3%) individuals in the EHR case  
329 group died, leading to a death rate of 1.2%. Four people in the survey case group died, with a  
330 death rate of 0.22%.

331 The EHR is a longitudinal data source, therefore we can capture COVID-19 cases on a  
332 continuing basis, whereas the survey reflects a point in time and can only identify individuals  
333 who had COVID-19 before they took the survey. Among 907 COVID-19 cases identified in the  
334 EHR who completed the survey but did not report a positive COVID-19 diagnosis in the survey,  
335 41.8% reported receiving a negative COVID-19 test result ( $n = 379$ ), and 58.2% had not taken a  
336 COVID-19 test and were presumed to be negative ( $n = 528$ ). The majority of these individuals  
337 (80.7%) completed the survey before they were diagnosed with COVID-19 in the EHR ( $n =$   
338 732).

339

### 340 **COVID-19 Case and Hospitalization Discordance between the EHR and Survey**

341 To quantify discordance of COVID-19 case status between the EHR and the survey we  
342 looked across our entire set of survey respondents ( $n = 25,063$ ). We only counted a participant as

343 “EHR COVID-19+” if the diagnosis was prior to taking the survey, not COVID-19 cases that  
 344 happened after the survey was taken. While neither the survey nor the EHR are a gold standard  
 345 for case classification, we can look at the discordance between them to identify the potential for  
 346 misclassification. Overall, there were a total of 1,006 respondents discordant for COVID-19  
 347 case-status (4%). One hundred seventy-three individuals of the 25,063 individuals who took the  
 348 survey were identified as COVID-19+ in the EHR but negative or not tested in the survey,  
 349 leading to a discordance rate of 0.7% (**Table 2**). 833 individuals were identified as COVID-19+  
 350 in the survey but negative in the EHR, leading to a discordance rate of 3.3%.

351

352 **Table 2: Case Status Misclassification Between the Survey and EHR**

|                                          | Survey COVID+ | Survey COVID Other<br>(Negative or Not Tested) | Total |
|------------------------------------------|---------------|------------------------------------------------|-------|
| EHR COVID+                               | 533           | 173                                            | 706   |
| EHR COVID Other (Negative or Not Tested) | 833           | 23524                                          | 24357 |
| Total                                    | 1366          | 23697                                          | 25063 |

353

354 To quantify discordance of hospitalization status in both the EHR and in the survey, we  
 355 restricted it to individuals who responded to the survey and were either COVID-19 positive in  
 356 the EHR or the survey (n = 2,273). EHR hospitalizations were only considered if they were prior  
 357 to taking the survey. There were 6 individuals who were positive for hospitalization in the EHR  
 358 but negative in the survey, a discordance rate of 0.3% (**Table 3**). There were 59 individuals who  
 359 were positive for hospitalization in the survey who were negative in the EHR, a discordance rate  
 360 of 2.6%.

361

362

363

364 **Table 3: Hospitalization Misclassification Between the Survey and EHR**

|                       | Survey Hospitalization + | Survey Hospitalization - | Total |
|-----------------------|--------------------------|--------------------------|-------|
| EHR Hospitalization + | 49                       | 6                        | 55    |
| EHR Hospitalization - | 59                       | 2159                     | 2218  |
| Total                 | 108                      | 2165                     | 2273  |

365

366 **DISCUSSION**

367 We found that the COVID-19 pandemic has had far-reaching and varying effects among  
 368 our Biobank participants. Over 84% of the 25,063 survey respondents reported having one or  
 369 more COVID-related symptoms since February 2020, 40% were tested for the virus, 13% of  
 370 those tested were positive, and among positive cases, 45% sought medical care following their  
 371 diagnosis. Our overall case positivity rate of 13% is comparable to those reported by other EHR-  
 372 based retrospective studies conducted in 2020 and 2021 [8, 9]. However, our finding of higher  
 373 positivity rates among our younger participants (aged 18-39 years; 20%) and Hispanics (19%) in  
 374 our participants has not been reported previously and may reflect differences in reasons for  
 375 testing in these groups (e.g. due to having symptoms or recent exposure vs. other reasons).  
 376 Though not surprising that a large proportion of respondents reported having symptoms given  
 377 the breadth of symptoms reported (e.g. runny nose, fever, body aches), it is notable that 40% of  
 378 those with symptoms did not undergo testing nor seek medical care. It is likely that a percentage  
 379 of this group had COVID-19 and would not be counted as such via public health surveillance  
 380 efforts, which could lead to substantial underestimates of the true infection rate in the general  
 381 population.

382 The vast majority of all survey respondents (75%) reported a negative impact from the  
 383 COVID-19 pandemic—most commonly around mental health and family life. We found that  
 384 females more often reported negative impacts than males in all domains—employment, family

385 life, mental and physical health. This disproportionate negative impact on females is consistent  
386 with prior public health emergencies [10], including the 2016 Zika and 2014 Ebola outbreaks  
387 [11]. Among U.S. women, this has been described in several areas, including the healthcare  
388 workforce, reproductive health, drug development, gender-based violence, and mental health  
389 [12]. It is both notable and concerning that nearly 75% of younger adults (aged 18-29 years)  
390 reported negative impacts on their mental health, which was higher than for any other group. The  
391 younger end of this range captures members of Generation Z, who are more likely to report poor  
392 mental health compared to prior generations [13, 14]. However, they are also more likely to  
393 receive mental health therapy or treatment [13], and therefore may accept interventions to  
394 address the negative mental health consequences of the COVID-19 pandemic. Further, we found  
395 that negative impacts on employment were more commonly reported among Black participants.  
396 These findings highlight the breadth of negative impacts of this pandemic in our community, and  
397 reveal the disproportionate impact experienced by certain subgroups that should be targeted in  
398 future intervention efforts.

399         Our study population had a much higher vaccination rate compared to Colorado overall  
400 and the general US population. Over 95% of our survey participants are fully vaccinated  
401 compared to 76% of adults throughout Colorado [15]. Vaccination directly reduces likelihood of  
402 infection and severity of disease but it also has an indirect effect on society via reduced viral  
403 transmission and herd immunity. Because of this impact on others, getting vaccinated is  
404 considered a prosocial behavior [16-18]. Being a participant in a biobank has also been  
405 positively associated with prosocial behavior, as the individuals who participate in biobanks tend  
406 to be motivated by furthering research for the greater good [19, 20]. Since our study population  
407 only includes those who elected to be in the biobank and additionally, those who responded to



408 the survey, these are likely individuals with high levels of prosocial behaviors, which likely  
409 explains the high vaccination rate. Given our highly self-selected study population, results may  
410 not generalize outside of the CCPM Biobank and UCHealth population. However, our ability to  
411 incorporate EHR data allows us to build a research population of biobank participants that is  
412 more representative of the entire patient population.

413 Differences between data captured in the EHR vs. those captured in the survey reveal the  
414 benefit of using both sources in combination. For example, mild cases with sub-clinical  
415 manifestations of infection that did not result in seeking care may be missing from the EHR but  
416 captured in a survey. The EHR is a longitudinal data source that collects clinical information on  
417 all patients diagnosed with and/or treated for COVID-19 within the UCHealth system  
418 irrespective of proclivity to participate in research or respond to surveys. As such, the EHR  
419 captured data from Biobank participants that the survey did not. Periodic analysis of EHR data  
420 will allow us to study COVID-19 reinfection and vaccine breakthrough cases over time.  
421 However, UCHealth is not a closed system and Biobank participants can receive care outside of  
422 UCHealth, so we recognize that not all individuals that were diagnosed or treated for COVID-19  
423 are or will be captured in the EHR. We believe that the survey data more completely identifies  
424 individuals who did not seek healthcare or sought care outside of the UCHealth system, in  
425 particular patients who reported COVID-19 infection in the survey but had no corresponding  
426 record in the EHR.

427 COVID-19 has variable clinical presentations ranging from asymptomatic infections to  
428 severe symptoms that require hospitalization. We expected that COVID-19 patients identified in  
429 the EHR would be sicker on average than survey only cases, more likely to have severe COVID-  
430 19 and less likely to have asymptomatic infections [22, 23]. However, we found that there was a

431 slightly higher percentage of COVID-19 hospitalizations among survey cases compared to EHR  
432 cases. This unexpected result may be explained, in part, by the fact that the survey likely  
433 undercounts deaths due to COVID-19, since the survey cannot identify anyone who died from  
434 COVID-19 unless they took the survey in between being diagnosed with COVID-19 and dying,  
435 whereas our clinical data warehouse (that combines EHR data with state vital statistics) will  
436 capture all deaths reported to CDPHE. With respect to participant demographics, it notable that a  
437 higher percentage of younger (18-29) and Hispanic/Latino positive cases were identified via the  
438 EHR vs. the survey. This may in part be explained by lower survey response rates in these  
439 groups. Hispanic/Latino individuals may have been less likely to take the survey because of  
440 language barriers (the survey was only in English), limited internet access or other structural  
441 barriers[24]. Lower participation among Hispanic individuals is consistent with observations in  
442 other outreach efforts [19806848] and is a limitation of the convenience survey design.  
443 Additionally, the Hispanic population in Colorado, as in many other states, had higher incidence  
444 of COVID-19 infections, hospitalizations, and death [4, 25-28], which may explain why they are  
445 more likely to be identified through the EHR.

446         A key strength to this study is our ability to leverage an existing, living resource in the  
447 CCPM Biobank and survey engine to assess the health and wellbeing of our participants in ways  
448 that are not highlighted by the EHR. Further, because participants consent to re-contact, we have  
449 the opportunity to follow up with sub-populations within our cohort to collect additional  
450 information and monitor outcomes such as re-infection and vaccine uptake. Although our  
451 overall response to the survey was sizeable, we acknowledge that the composition of the  
452 underlying patient population at UCHealth who enrolled in the Biobank, and differential

453 response to the survey may have introduced some bias and limited the generalizability of our  
454 results.

455

## 456 **CONCLUSION**

457         The combination of EHR and survey data provides a powerful opportunity to monitor and  
458 study the on-going effects of the COVID-19 pandemic in our communities. As the pandemic  
459 continues, there is a critical need for optimal COVID-19 case ascertainment in order to capture  
460 both mild and severe cases, and to monitor specific long-term outcomes such as post-acute  
461 sequelae of SARS-CoV-2 infection (PASC) or downstream breakthrough infections post-  
462 vaccination. In an open health system as is common in the United States, the development of a  
463 combined resource such as ours (with EHR and survey data) represents long-term potential for  
464 additional recruitment and follow-up as a critical complement to large-scale informatics-focused  
465 investigations such as the National COVID Cohort Collaborative[29]. As the pandemic  
466 continues, we anticipate that resources such as the CCPM Biobank and other biobanks will  
467 continue to be a key resource for ongoing data collection relevant to population health  
468 monitoring during the era of COVID-19 and other emerging public health issues.

469

## 470 **ACKNOWLEDGMENTS**

471 We would like to thank all participants in CCPM, as well as the entire CCPM team making these  
472 research initiatives a possibility in the pandemic. CCPM is supported by UHealth and the  
473 University of Colorado Anschutz Medical Campus. We thank Eric Campbell for assistance on  
474 survey design. The research derivation of the EHR was made possible by the Health Data  
475 Compass Data Warehouse project ([healthdatacompass.org](http://healthdatacompass.org)). KMM and CRG are partially

476 supported by R01HG011345. The REDCap database in this publication was supported by  
477 NIH/NCATS Colorado CTSA Grant Number UL1TR002535. The contents are the authors' sole  
478 responsibility and do not necessarily represent official NIH views.

479

480 **CONFLICTS OF INTEREST**

481 All authors report no relevant conflicts of interest.

482

483 **REFERENCES**

- 484 1. CDC. COVID-19. Centers for Disease Control and Prevention; [cited 2021 12/10/2021];  
485 Available from: <https://www.cdc.gov/coronavirus/2019-ncov/index.html>.
- 486 2. Magesh S, John D, Li WT, Li Y, Mattingly-App A, Jain S, et al. Disparities in COVID-  
487 19 Outcomes by Race, Ethnicity, and Socioeconomic Status: A Systematic-Review and Meta-  
488 analysis. *JAMA Netw Open*. 2021 Nov 1;4(11):e2134147. PMID: 34762110. doi:  
489 10.1001/jamanetworkopen.2021.34147.PMC8586903
- 490 3. Tenforde MW, Billig Rose E, Lindsell CJ, Shapiro NI, Files DC, Gibbs KW, et al.  
491 Characteristics of Adult Outpatients and Inpatients with COVID-19 - 11 Academic Medical  
492 Centers, United States, March-May 2020. *MMWR Morb Mortal Wkly Rep*. 2020 Jul  
493 3;69(26):841-6. PMID: 32614810. doi: 10.15585/mmwr.mm6926e3.PMC7332092
- 494 4. Acosta AM, Garg S, Pham H, Whitaker M, Anglin O, O'Halloran A, et al. Racial and  
495 Ethnic Disparities in Rates of COVID-19-Associated Hospitalization, Intensive Care Unit  
496 Admission, and In-Hospital Death in the United States From March 2020 to February 2021.  
497 *JAMA Netw Open*. 2021 Oct 1;4(10):e2130479. PMID: 34673962. doi:  
498 10.1001/jamanetworkopen.2021.30479.PMC8531997
- 499 5. Morlock R, Morlock A, Downen M, Shah SN. COVID-19 prevalence and predictors in  
500 United States adults during peak stay-at-home orders. *PLoS One*. 2021;16(1):e0245586. PMID:  
501 33481900. doi: 10.1371/journal.pone.0245586.PMC7822538
- 502 6. International Common Disease Alliance. [January 10, 2022]; Available from:  
503 <https://www.icda.bio/>.
- 504 7. Harris PA, Taylor R, Thielke R, Payne J, Gonzalez N, Conde JG. Research electronic  
505 data capture (REDCap)--a metadata-driven methodology and workflow process for providing  
506 translational research informatics support. *J Biomed Inform*. 2009 Apr;42(2):377-81. PMID:  
507 18929686. doi: 10.1016/j.jbi.2008.08.010.PMC2700030
- 508 8. Lindsay L, Secrest MH, Rizzo S, Keebler DS, Yang F, Tsai L. Factors associated with  
509 COVID-19 viral and antibody test positivity and assessment of test concordance: a retrospective  
510 cohort study using electronic health records from the USA. *BMJ Open*. 2021 Oct  
511 1;11(10):e051707. PMID: 34598988. doi: 10.1136/bmjopen-2021-051707.PMC8488284
- 512 9. Sheehan MM, Reddy AJ, Rothberg MB. Reinfection Rates Among Patients Who  
513 Previously Tested Positive for Coronavirus Disease 2019: A Retrospective Cohort Study.  
514 *Clinical Infectious Diseases*. 2021;73(10):1882-6. doi: 10.1093/cid/ciab234
- 515 10. Smith J. Overcoming the 'tyranny of the urgent': integrating gender into disease outbreak  
516 preparedness and response. *Gender & Development*. 2019;27(2):355-69.
- 517 11. Davies SE, Bennett B. A gendered human rights analysis of Ebola and Zika: locating  
518 gender in global health emergencies. *International Affairs*. 2016;92(5):1041-60.

- 519 12. Connor J, Madhavan S, Mokashi M, Amanuel H, Johnson NR, Pace LE, et al. Health  
520 risks and outcomes that disproportionately affect women during the Covid-19 pandemic: A  
521 review. *Soc Sci Med.* 2020 Dec;266:113364. PMID: 32950924. doi:  
522 10.1016/j.socscimed.2020.113364.PMC7487147
- 523 13. Association AP. 2018 Stress in America: Generation Z. Stress in America™ Survey.  
524 Washington, DC: American Psychological Association (APA), 2018.
- 525 14. Association AP. Stress in America™: One Year Later, A New Wave of Pandemic Health  
526 Concerns. Washington, DC: American Psychological Association (APA), 2021.
- 527 15. CDPHE. Colorado COVID-19 Vaccination Data. Colorado Department of Public Health  
528 and the Environment; [12/17/2021]; Available from: [https://covid19.colorado.gov/vaccine-data-](https://covid19.colorado.gov/vaccine-data-dashboard)  
529 [dashboard](https://covid19.colorado.gov/vaccine-data-dashboard).
- 530 16. Böhm R, Betsch C, Korn L, Holtmann C. Exploring and Promoting Prosocial  
531 Vaccination: A Cross-Cultural Experiment on Vaccination of Health Care Personnel. *Biomed*  
532 *Res Int.* 2016;2016:6870984. PMID: 27725940. doi: 10.1155/2016/6870984.PMC5048021
- 533 17. Böhm R, Betsch C, Korn L. Selfish-rational non-vaccination: Experimental evidence  
534 from an interactive vaccination game. *Journal of Economic Behavior & Organization.* 2016  
535 2016/11/01;131:183-95. doi: <https://doi.org/10.1016/j.jebo.2015.11.008>
- 536 18. Cucciniello M, Pin P, Imre B, Porumbescu GA, Melegaro A. Altruism and vaccination  
537 intentions: Evidence from behavioral experiments. *Soc Sci Med.* 2021 Jul 13:114195. PMID:  
538 34602309. doi: 10.1016/j.socscimed.2021.114195
- 539 19. Broekstra R, Aris-Meijer J, Maeckelberghe E, Stolk R, Otten S. Demographic and  
540 prosocial intrapersonal characteristics of biobank participants and refusers: the findings of a  
541 survey in the Netherlands. *Eur J Hum Genet.* 2021 Jan;29(1):11-9. PMID: 32737438. doi:  
542 10.1038/s41431-020-0701-1.PMC7852517
- 543 20. Streicher SA, Sanderson SC, Jabs EW, Diefenbach M, Smirnoff M, Peter I, et al. Reasons  
544 for participating and genetic information needs among racially and ethnically diverse biobank  
545 participants: a focus group study. *J Community Genet.* 2011 Sep;2(3):153-63. PMID: 22109822.  
546 doi: 10.1007/s12687-011-0052-2.PMC3186034
- 547 21. CDPHE, Colorado State Emergency Operations Center, Testing & Notifications.  
548 [January 10, 2022]; Available from: <https://covid19.colorado.gov/testing-notifications>.
- 549 22. Violán C, Foguet-Boreu Q, Hermosilla-Pérez E, Valderas JM, Bolívar B, Fàbregas-  
550 Escurriola M, et al. Comparison of the information provided by electronic health records data  
551 and a population health survey to estimate prevalence of selected health conditions and  
552 multimorbidity. *BMC Public Health.* 2013 Mar 21;13:251. PMID: 23517342. doi: 10.1186/1471-  
553 2458-13-251.PMC3659017

- 554 23. Mizrahi B, Shilo S, Rossman H, Kalkstein N, Marcus K, Barer Y, et al. Longitudinal  
555 symptom dynamics of COVID-19 infection. *Nat Commun.* 2020 Dec 4;11(1):6208. PMID:  
556 33277494. doi: 10.1038/s41467-020-20053-y.PMC7718370
- 557 24. Jang M, Vorderstrasse A. Socioeconomic Status and Racial or Ethnic Differences in  
558 Participation: Web-Based Survey. *JMIR Res Protoc.* 2019 Apr 10;8(4):e11865. PMID:  
559 30969173. doi: 10.2196/11865.PMC6479282
- 560 25. Podewils LJ, Burket TL, Mettenbrink C, Steiner A, Seidel A, Scott K, et al.  
561 Disproportionate Incidence of COVID-19 Infection, Hospitalizations, and Deaths Among  
562 Persons Identifying as Hispanic or Latino - Denver, Colorado March-October 2020. *MMWR*  
563 *Morb Mortal Wkly Rep.* 2020 Dec 4;69(48):1812-6. PMID: 33270613. doi:  
564 10.15585/mmwr.mm6948a3.PMC7714035
- 565 26. Moore JT, Ricaldi JN, Rose CE, Fuld J, Parise M, Kang GJ, et al. Disparities in Incidence  
566 of COVID-19 Among Underrepresented Racial/Ethnic Groups in Counties Identified as Hotspots  
567 During June 5-18, 2020 - 22 States, February-June 2020. *MMWR Morb Mortal Wkly Rep.* 2020  
568 Aug 21;69(33):1122-6. PMID: 32817602. doi: 10.15585/mmwr.mm6933e1.PMC7439982
- 569 27. Romano SD, Blackstock AJ, Taylor EV, El Burai Felix S, Adjei S, Singleton CM, et al.  
570 Trends in Racial and Ethnic Disparities in COVID-19 Hospitalizations, by Region - United  
571 States, March-December 2020. *MMWR Morb Mortal Wkly Rep.* 2021 Apr 16;70(15):560-5.  
572 PMID: 33857068. doi: 10.15585/mmwr.mm7015e2.PMC8344991
- 573 28. Mackey K, Ayers CK, Kondo KK, Saha S, Advani SM, Young S, et al. Racial and Ethnic  
574 Disparities in COVID-19-Related Infections, Hospitalizations, and Deaths : A Systematic  
575 Review. *Ann Intern Med.* 2021 Mar;174(3):362-73. PMID: 33253040. doi: 10.7326/m20-  
576 6306.PMC7772883
- 577 29. National COVID Cohort Collaborative (N3C). [January 10, 2022]; Available from:  
578 <https://ncats.nih.gov/n3c>.
- 579

## **ABBREVIATIONS**

CCPM Colorado Center for Personalized Medicine

EHR Electronic Health Record
